# Supplementary material
Source: publisher figshare collection journal article supplement (https://acs.figshare.com/ndownloader/files/17274128)
Supplement: Supplementary file 1 [file 17274128]

Compound	SMILES	PHGDH_NAD+ high assay [nM]	PHGDH_NAD+ low assay [nM]
8	n1(c3c(cc1C(=O)Nc2cc(ccc2)C(=O)O)cccc3)C	>100000.0	26110.9
9	n1(nc(cc1C(=O)NC2CC2)-c3ccccc3)C	>100000.0	>100000.0
10	CN1N=C(C=C1C(O)=O)C1=CC=CC=C1
11	n1(nc(cc1C(=O)N[C@H](C)c2ccccc2)-c3ccccc3)C		>100000.0
12	n1(nc(cc1C(=O)N[C@@H](C)c2ccccc2)-c3ccccc3)C		21894.7
13	n1(nc(cc1C(=O)NCc2ccccc2)-c3ccccc3)C		> 100000.0
14	n1(nc(cc1C(=O)NC(C)(C)c2ccc(cc2)C(=O)O)-c3ccccc3)C		1216.2
16	n1(nc(cc1C(=O)NCc2ccc(cc2)C(=O)O)-c3ccccc3)C		5714.3
17	n1(nc(cc1C(=O)NC(C)c2ccc(cc2)C(=O)O)-c3ccccc3)C	8605	888.2
18	S(=O)(=O)(N)c1ccc(cc1)C(NC(=O)c2n(nc(c2)-c3ccccc3)C)C	29526.6	4331
19	[N+](=O)([O-])c1ccc(cc1)[C@H](NC(=O)c2n(nc(c2)-c3ccccc3)C)C		55377.7
20	n1(nc(cc1C(=O)N[C@H](C)c2ccc(cc2)N)-c3ccccc3)C		38127.8
21	n1(nc(cc1C(=O)N[C@H](C)c2ccc(cc2)N3CCCC3=O)-c4ccccc4)C		1981.1
22	S(=O)(=O)(C)c1ccc(cc1)C(NC(=O)c2n(nc(c2)-c3ccccc3)C)C	24344.7	5763.8
23	n1(nc(cc1C(=O)N[C@H](C)c2ccc(cc2)N3C[C@H]([C@H](C3)O)O)-c4ccccc4)C	20294.8	5223.2
24	n1(nc(cc1C(=O)N[C@H](C)c2ccc(cc2)N3C[C@H](CC3)O)-c4ccccc4)C		12201.9
25	n1(nc(cc1C(=O)N[C@H](C)c2ccc(cc2)N3CCCC3)-c4ccccc4)C		42130.2
26	S1(=O)(=O)N(CCC1)c2ccc(cc2)[C@H](NC(=O)c3n(nc(c3)-c4ccccc4)C)C		1804.8
27	n1(nc(cc1C(=O)N[C@H](C)c2ccc(cc2)N3C(=O)NCC3=O)-c4ccccc4)C	15005.4	2336.1
28	n1(nc(cc1C(=O)N[C@H](C)c2ccc(cc2)N3[C@@H](CCC3=O)C(=O)O)-c4ccccc4)C	1026.2	107.8
29	n1(nc(cc1C(=O)N[C@H](C)c2ccc(cc2)NC(=N)N)-c3ccccc3)C		>100000.0
30	n1(nc(cc1C(=O)NC(C)c2ccc(cc2)N(C)C(=N)N)-c3ccccc3)C		39179.3
31	S(=O)(=O)(N(C)c1ccc(cc1)C(NC(=O)c2n(nc(c2)-c3ccccc3)C)C)C		6596.9
32	S(=O)(=O)(Nc1ccc(cc1)[C@H](NC(=O)c2n(nc(c2)-c3ccccc3)C)C)C		49800.9
33	n1(nc(cc1C(=O)N[C@H](C)c2ccc(cc2)OC)-c3ccccc3)C		16156.3
34	n1(nc(cc1C(=O)N[C@H](C)c2ccc(cc2)C(=O)N)-c3ccccc3)C		3051.7
35	n1(nc(cc1C(=O)NC(C)c2ccc(cc2)-c3cncnc3)-c4ccccc4)C		21491.4
36	n1(nc(cc1C(=O)N[C@H](C)c2ccc(cc2)C)-c3ccccc3)C		23207.8
37	n1(nc(cc1C(=O)N[C@H](C)c2ccc(cc2)CO)-c3ccccc3)C		6033.5
38	n1(nc(cc1C(=O)NC(C)c2ccc(cc2)C#N)-c3ccccc3)C		32596.4
39	S(=O)(=O)(NC(=O)c1ccc(cc1)[C@H](NC(=O)c2n(nc(c2)-c3ccccc3)C)C)C	3309.4	333.9
40	S(=O)(=O)(NC(=O)C)c1ccc(cc1)C(NC(=O)c2n(nc(c2)-c3ccccc3)C)C	686.1	70
41	S(=O)(=O)(N(CC(=O)O)c1ccc(cc1)[C@H](NC(=O)c2n(nc(c2)-c3ccccc3)C)C)C		1403.9
42	n1(nc(cc1C(=O)NC(C)c2ccc(cc2)CC(=O)O)-c3ccccc3)C	7252.5	736.1
43	S(=O)(=O)(CC(=O)O)c1ccc(cc1)[C@H](NC(=O)c2n(nc(c2)-c3ccccc3)C)C	144.9	24.8
44	n1(c3c(cc1C(=O)N[C@H](C)c2ccc(cc2)C(=O)O)cccc3)C		1946.7
45	Clc3cc1c(n(c(c1)C(=O)N[C@H](C)c2ccc(cc2)C(=O)O)C)cc3	2367.9	254.4
46	Clc3cc1c(n(c(c1)C(=O)N[C@H](C)c2ccc(cc2)C(=O)O)C)c(c3)OC	746.2	72.3
47	FC(F)(F)Oc2c1n(c(cc1cc(c2)Cl)C(=O)N[C@H](C)c3ccc(cc3)C(=O)O)C	6694.5	824
48	Brc3c(cc1c(n(c(c1)C(=O)N[C@H](C)c2ccc(cc2)C(=O)O)C)c3)Cl	341.2	60.6
49	n3(c1c(c2c(cc1)cccc2)cc3C(=O)N[C@H](C)c4ccc(cc4)C(=O)O)C	345.2	58.4
50	Clc2c(cc1n(c(cc1c2)C(=O)N[C@H](C)c3ccc(cc3)C(=O)O)C)C	411.7	51.4
51	Clc3c1c(n(c(c1)C(=O)N[C@H](C)c2ccc(cc2)C(=O)O)C)ccc3Cl	227.8	30.4
52	Clc3c1c(n(c(c1)C(=O)N[C@H](C)c2ccc(cc2)C(=O)O)C)cc(c3)C	245.6	28.1
53	Clc3c1c(n(c(c1)C(=O)N[C@H](C)c2ccc(cc2)C(=O)O)C)cc(c3)CC	301.2	30.1
54	FC(F)c2cc1n(c(cc1c(c2)Cl)C(=O)N[C@H](C)c3ccc(cc3)C(=O)O)C	714.4	80.5
55	Fc3c(c1c(n(c(c1)C(=O)N[C@H](C)c2ccc(cc2)C(=O)O)C)c(c3)OC)Cl	1294.3	123.1
56	n3(c1c(c2c(c(c1)C)cccc2)cc3C(=O)N[C@H](C)c4ccc(cc4)C(=O)O)C	248.6	28.1
57	Clc3c1c(n(c(c1)C(=O)N[C@H](C)c2ccc(cc2)C(=O)O)C)cc(c3Cl)C	95.5	13.7
58	Clc3c1c(n(c(c1)C(=O)N[C@H](C)c2ccc(cc2)S(=O)(=O)CC(=O)O)C)cc(c3Cl)C	3.9	1.7
59	Clc3c1c(n(c(c1)C(=O)N[C@H](C)c2ccc(cc2)S(=O)(=O)CC(=O)O)C)cc(c3)C	7.9	2.5
60	Clc3cc1c(n(c(c1)C(=O)NC(CO)c2ccccc2)C)cc3		5230.4
61	Clc3cc1c(n(c(c1)C(=O)NC(c2ccccc2)C(=O)O)C)cc3		>100000.0
62	Clc3cc1c(n(c(c1)C(=O)NC(CCO)c2ccccc2)C)cc3		100000
63	Clc3cc1c(n(c(c1)C(=O)NC(COC)c2ccccc2)C)cc3		>100000.0
64	Clc3cc1c(n(c(c1)C(=O)NC(CN)c2ccccc2)C)cc3		39603.9
65	Clc3cc1c(n(c(c1)C(=O)NC(c2ccccc2)C(=O)N)C)cc3		>100000.0
66	Clc3cc1c(n(c(c1)C(=O)N[C@H]([C@H](O)C)c2ccccc2)C)cc3		12129.9
67	Clc3cc1c(n(c(c1)C(=O)N[C@H]([C@@H](O)C)c2ccccc2)C)cc3		11729.8
68	FC(F)(F)[C@@H](O)[C@@H](NC(=O)c1n(c2c(c1)cc(cc2)Cl)C)c3ccccc3		>100000.0
69	FC(F)(F)[C@H](O)[C@@H](NC(=O)c1n(c2c(c1)cc(cc2)Cl)C)c3ccccc3		>100000.0
BI-4924	CN1C(=CC2=C1C=C(C)C(Cl)=C2Cl)C(=O)N[C@H](CO)C1=CC=C(C=C1)S(=O)(=O)CC(O)=O	2.9
BI-4916	CCOC(=O)CS(=O)(=O)C1=CC=C(C=C1)[C@@H](CO)NC(=O)C1=CC2=C(C=C(C)C(Cl)=C2Cl)N1C	>100
